# Supplementary material for: Microbiome analysis of raw honey reveals important factors influencing the bacterial and fungal communities
Source: PubMed Central journal article supplement (PMC9877413; doi:10.3389/fmicb.2022.1099522), 2023-01-12
Supplement: Data_Sheet_1.pdf [file Data_Sheet_1.pdf]

## Supplementary Material

### 1 Supplementary Figures and Tables

#### 1.1 Supplementary Figures

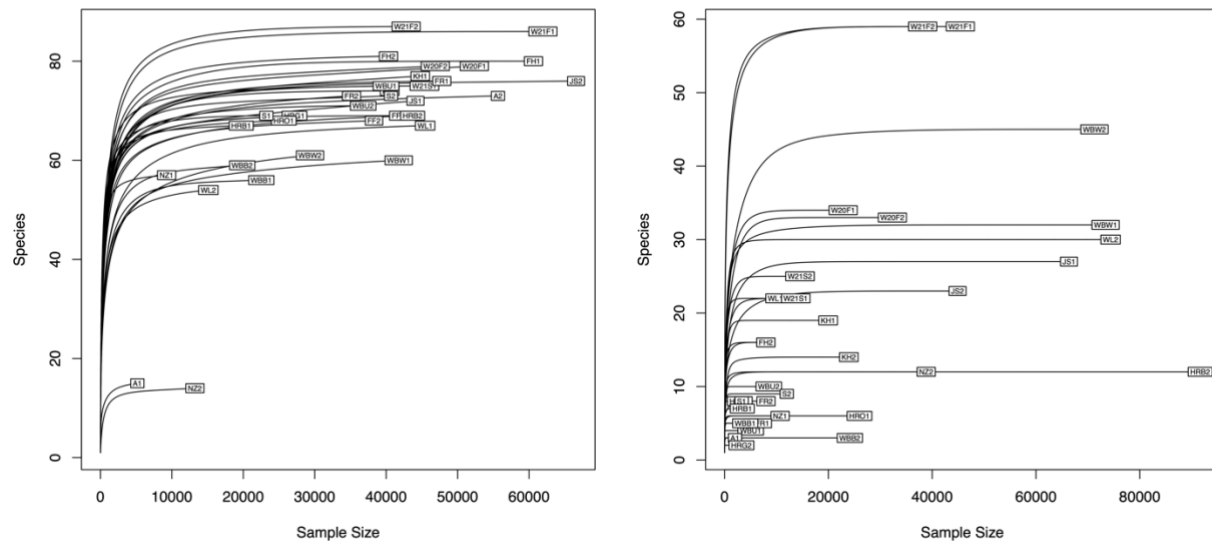

**Supplementary Figure 1.** Rarefaction curves of bacterial and fungal ASV diversity for each honey sample based on the number of obtained reads in the sequencing libraries and identified species.

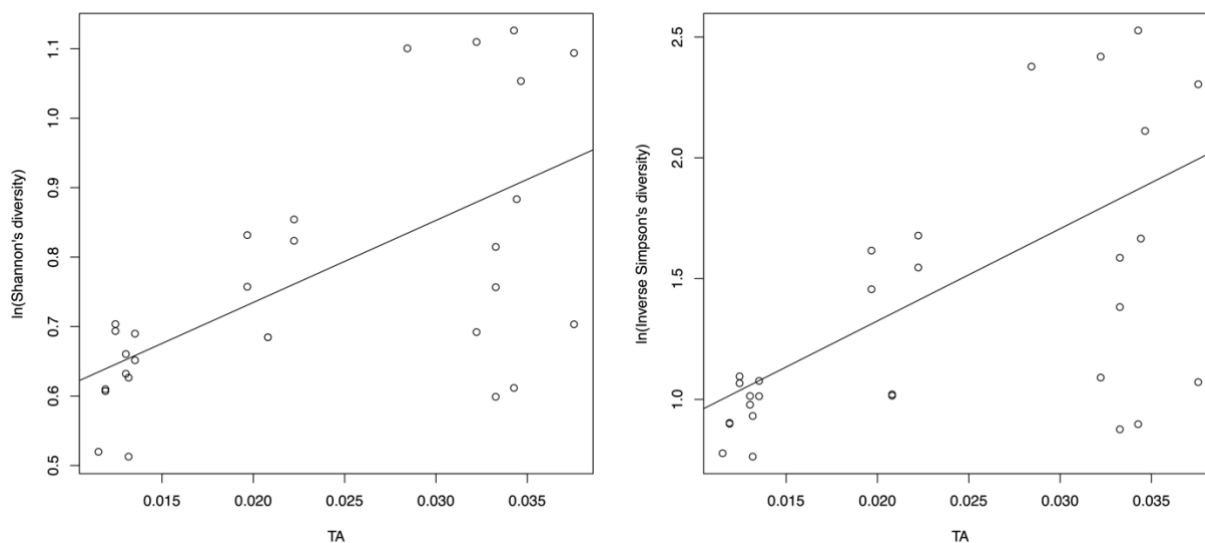

**Supplementary Figure 2.** Correlations between titratable acidity (TA) of honey samples and their bacterial community alpha diversity metrics. Shannon diversity and inverse Simpson diversity metrics were log-transformed and plotted with lines fitted by quasi-Poisson generalized linear model.

## 1.2 Supplementary Tables

**Supplementary Table 1.** Alpha diversity values for bacterial community of each honey sample based on 16S ASVs.

| Sample ID | Honey Type          | shannon | invsimp | chao1 | ACE    |
|-----------|---------------------|---------|---------|-------|--------|
| FH1       | Feral Honey         | 1.983   | 2.761   | 70.30 | 71.151 |
| FH2       | Feral Honey         | 1.983   | 2.776   | 77.60 | 78.856 |
| FR1       | Feral Honey         | 1.840   | 2.467   | 73.11 | 74.724 |
| FR2       | Feral Honey         | 1.835   | 2.458   | 65.00 | 65.161 |
| A2        | Manuka Honey        | 1.820   | 2.402   | 70.25 | 67.786 |
| NZ1       | Manuka Honey        | 3.006   | 10.779  | 58.00 | 58.498 |
| S1        | Manuka Honey        | 3.084   | 12.513  | 67.50 | 67.912 |
| S2        | Manuka Honey        | 1.843   | 2.453   | 70.33 | 71.621 |
| HRB1      | Honey<br>Monofloral | 3.033   | 11.231  | 65.50 | 66.304 |
| HRB2      | Honey<br>Monofloral | 1.998   | 2.976   | 59.67 | 60.286 |
| HRG1      | Honey<br>Monofloral | 2.419   | 5.289   | 70.60 | 69.393 |
| HRO1      | Honey               | 2.867   | 8.259   | 68.00 | 66.454 |

|       |                     |       |        |       |        |
|-------|---------------------|-------|--------|-------|--------|
| WBB1  | Monofloral<br>Honey | 2.132 | 4.288  | 56.00 | 57.328 |
| WBB2  | Monofloral<br>Honey | 2.297 | 5.033  | 57.20 | 57.280 |
| WBU1  | Monofloral<br>Honey | 2.986 | 10.015 | 71.50 | 71.779 |
| WBU2  | Monofloral<br>Honey | 2.020 | 2.920  | 66.60 | 67.114 |
| WBW1  | Monofloral<br>Honey | 2.131 | 3.984  | 54.00 | 52.033 |
| WBW2  | Monofloral<br>Honey | 2.258 | 4.885  | 60.00 | 59.319 |
| WL1   | Monofloral<br>Honey | 2.278 | 4.692  | 81.00 | 70.189 |
| WL2   | Monofloral<br>Honey | 2.349 | 5.355  | 51.20 | 51.837 |
| JS1   | Wildflower<br>Honey | 2.021 | 2.990  | 66.00 | 66.527 |
| JS2   | Wildflower<br>Honey | 2.001 | 2.907  | 70.67 | 71.946 |
| KH1   | Wildflower<br>Honey | 1.993 | 2.935  | 72.00 | 68.728 |
| KH2   | Wildflower<br>Honey | 1.919 | 2.754  | 69.50 | 70.880 |
| W20F1 | Wildflower<br>Honey | 1.882 | 2.659  | 74.50 | 75.074 |
| W20F2 | Wildflower<br>Honey | 1.936 | 2.756  | 69.00 | 70.395 |
| W21F1 | Wildflower<br>Honey | 1.871 | 2.538  | 84.88 | 84.474 |
| W21F2 | Wildflower<br>Honey | 1.670 | 2.145  | 86.75 | 85.277 |
| W21S1 | Honey               | 1.681 | 2.175  | 76.00 | 71.887 |

**Supplementary Table 2. Alpha diversity values for fungal community of each honey sample based on ITS ASVs.**

| Sample ID | Honey Type  | shannon | invsimp | chao1 | Evenness |
|-----------|-------------|---------|---------|-------|----------|
| FH1       | Feral Honey | 1.485   | 2.644   | 16.00 | 0.536    |
| FH2       | Feral Honey | 1.768   | 3.478   | 16.00 | 0.638    |
| FR1       | Feral Honey | 0.988   | 1.994   | 5.00  | 0.614    |
| FR2       | Feral Honey | 1.031   | 1.951   | 8.00  | 0.496    |

|       |                     |       |       |       |       |
|-------|---------------------|-------|-------|-------|-------|
| A1    | Manuka Honey        | 0.896 | 2.135 | 3.00  | 0.815 |
| A2    | Manuka Honey        | 0.582 | 1.365 | 5.00  | 0.362 |
| NZ1   | Manuka Honey        | 0.674 | 1.434 | 6.00  | 0.376 |
| NZ2   | Manuka Honey        | 1.246 | 2.394 | 12.00 | 0.501 |
| S1    | Manuka Honey        | 2.010 | 7.043 | 8.00  | 0.967 |
| S2    | Manuka Honey        | 1.071 | 2.039 | 9.00  | 0.487 |
| HRB1  | Monofloral<br>Honey | 1.597 | 4.366 | 7.00  | 0.821 |
| HRB2  | Monofloral<br>Honey | 1.135 | 2.548 | 11.00 | 0.473 |
| HRG1  | Monofloral<br>Honey | 1.769 | 4.518 | 8.00  | 0.851 |
| HRG2  | Monofloral<br>Honey | 0.268 | 1.162 | 2.00  | 0.386 |
| HRO1  | Monofloral<br>Honey | 1.068 | 2.445 | 6.00  | 0.596 |
| WBB1  | Monofloral<br>Honey | 1.150 | 2.385 | 5.00  | 0.715 |
| WBB2  | Monofloral<br>Honey | 0.743 | 2.000 | 3.00  | 0.676 |
| WBU1  | Monofloral<br>Honey | 0.969 | 2.198 | 4.00  | 0.699 |
| WBU2  | Monofloral<br>Honey | 1.040 | 1.764 | 10.00 | 0.452 |
| WBW1  | Monofloral<br>Honey | 1.011 | 1.589 | 32.00 | 0.297 |
| WBW2  | Monofloral<br>Honey | 1.087 | 1.742 | 41.25 | 0.320 |
| WL1   | Monofloral<br>Honey | 1.786 | 3.197 | 22.00 | 0.578 |
| WL2   | Wildflower<br>Honey | 1.248 | 1.944 | 29.75 | 0.371 |
| JS1   | Wildflower<br>Honey | 1.361 | 2.459 | 25.00 | 0.440 |
| JS2   | Wildflower<br>Honey | 1.432 | 2.642 | 33.00 | 0.496 |
| KH1   | Wildflower<br>Honey | 1.335 | 2.881 | 19.00 | 0.453 |
| KH2   | Wildflower<br>Honey | 1.226 | 2.730 | 13.00 | 0.478 |
| W20F1 | Wildflower<br>Honey | 1.854 | 4.890 | 35.67 | 0.540 |
| W20F2 | Wildflower<br>Honey | 1.828 | 4.828 | 33.00 | 0.538 |
| W21F1 | Wildflower<br>Honey | 2.633 | 7.358 | 54.00 | 0.673 |
| W21F2 | Honey               | 2.518 | 6.199 | 52.50 | 0.647 |

|       |                     |       |       |       |       |
|-------|---------------------|-------|-------|-------|-------|
| W21S1 | Wildflower<br>Honey | 0.701 | 1.320 | 26.00 | 0.234 |
| W21S2 | Wildflower<br>Honey | 1.292 | 2.253 | 23.00 | 0.412 |

---
